# Supplementary material for: Single nucleotide polymorphisms in native South American Atlantic coast populations of smooth shelled mussels: hybridization with invasive European Mytilus galloprovincialis
Source: Springer Nature journal article supplement (doi:10.1186/s12711-018-0376-z), 2018-02-22
Supplement: MOESM1 [file 12711_2018_376_MOESM1_ESM.pdf]

Table S1. SNP properties, genome location, substitution type, FST P-value associated with test for outlier status, minor allele frequency, GenBank annotation and references.

| Locus name | Location                                   | Region             | Substitution | Allele | Frequent allele | FST          |     |                |                 | N° of locations where the locus was polymorphic | MAF   | GenBank annotation | Reference            |
|------------|--------------------------------------------|--------------------|--------------|--------|-----------------|--------------|-----|----------------|-----------------|-------------------------------------------------|-------|--------------------|----------------------|
|            |                                            |                    |              |        |                 | FST          | B-Y | H <sub>o</sub> | F <sub>is</sub> |                                                 |       |                    |                      |
| 1 BM101A   | Ribosomal protein L7a                      | coding             | synon        | A/T    | T               | 0.748        |     | 0.435          | -0.006          | 8                                               | 0.084 | KT713378           | Wenne et al. 2016    |
| 2 BM102A   | Proteasome subunit beta type-6-like        | coding             | synon        | C/T    | T               | <b>0.145</b> | *   | 0.248          | -0.026          | 16                                              | 0.143 | KT713379           | Wenne et al. 2016    |
| 3 BM103B   | Proteasome subunit beta type-5-like        | coding             | nonsyn       | A/G    | A               | 0.737        |     | 0.074          | 0.053           | 1                                               | 0.014 | KT713380           | Wenne et al. 2016    |
| 4 BM105A   | UnKnown                                    | NA                 | NA           | A/G    | A               | 0.377        |     | 0.136          | 0.068           | 6                                               | 0.067 | KT713381           | Wenne et al. 2016    |
| 5 BM106B   | UnKnown                                    | NA                 | NA           | A/G    | G               | 0.787        |     | 0.417          | <b>0.980</b>    | 8                                               | 0.056 | KT713382           | Wenne et al. 2016    |
| 6 BM10B    | Ribosomal protein S20                      | coding             | synon        | A/C    | A               | 0.805        |     | 0.081          | 0.027           | 1                                               | 0.010 | KJ871040           | Zbawicka et al. 2014 |
| 7 BM113A   | Protein BTG1                               | coding             | synon        | A/T    | A               | <b>1</b>     | *   | 1.000          | 0               | 0                                               | 0.000 | KT713385           | Wenne et al. 2016    |
| 8 BM118A   | UnKnown                                    | NA                 | NA           | A/G    | G               | 0.139        |     | 0.055          | -0.027          | 5                                               | 0.029 | KT713388           | Wenne et al. 2016    |
| 9 BM11A    | Ribosomal protein L22                      | coding             | synon        | A/G    | A               | <b>0.982</b> |     | 0.098          | 0.000           | 1                                               | 0.001 | KJ871041           | Zbawicka et al. 2014 |
| 10 BM12A   | Ribosomal protein L23a                     | coding             | synon        | C/T    | T               | <b>0.875</b> |     | 0.454          | 0.092           | 7                                               | 0.038 | KJ871042           | Zbawicka et al. 2014 |
| 11 BM12C   | Ribosomal protein L23a                     | coding             | synon        | C/T    | C               | 0.628        |     | 0.417          | 0.096           | 14                                              | 0.100 | KJ871042           | Wenne et al. 2016    |
| 12 BM147A  | UnKnown                                    | NA                 | NA           | C/T    | C               | <b>0.434</b> | *   | 0.380          | -0.004          | 17                                              | 0.141 | KT713383           | Wenne et al. 2016    |
| 13 BM151A  | adhesive foot protein gene                 | coding             | synon        | G/T    | G               | <b>0.865</b> |     | 0.434          | <b>0.178</b>    | 9                                               | 0.033 | HQ257471.1         | Gardner et al. 2016  |
| 14 BM16B   | ribosomal protein L21                      | coding             | synon        | C/T    | A               | <b>0.014</b> | *   | 0.280          | -0.035          | 19                                              | 0.167 | KJ871044           | Wenne et al. 2016    |
| 15 BM17B   | Ribosomal protein L7a                      | coding             | synon        | A/G    | A               | 0.684        |     | 0.477          | 0.100           | 11                                              | 0.113 | KJ871045           | Zbawicka et al. 2014 |
| 16 BM201B  | <i>H4 histone</i> gene                     | noncoding (intron) | NA           | A/C    | C               | 0.704        |     | 0.070          | <b>0.727</b>    | 1                                               | 0.015 | AY267750.1         | Zbawicka et al. 2012 |
| 17 BM201C  | <i>H4 histone</i> gene                     | coding             | synon        | G/T    | T               | 0.513        |     | 0.243          | -0.039          | 8                                               | 0.093 | AY267750.1         | Zbawicka et al. 2012 |
| 18 BM202A  | <i>H3 histone</i> gene                     | noncoding (intron) | NA           | A/C    | A               | <b>1</b>     | *   | 1.000          | 0               | 0                                               | 0.000 | AY267749.1         | Zbawicka et al. 2012 |
| 19 BM202B  | <i>H3 histone</i> gene                     | coding             | synon        | A/T    | T               | <b>1</b>     | *   | 1.000          | 0               | 0                                               | 0.000 | AY267749.1         | Zbawicka et al. 2012 |
| 20 BM203B  | <i>H2B histone</i> gene                    | noncoding (intron) | NA           | C/T    | C               | 0.492        |     | 0.241          | -0.030          | 8                                               | 0.095 | AY267742.1         | Zbawicka et al. 2012 |
| 21 BM203C  | <i>H2B histone</i> gene                    | noncoding (intron) | NA           | C/T    | A               | 0.622        |     | 0.530          | 0.064           | 18                                              | 0.131 | AY267742.1         | Zbawicka et al. 2012 |
| 22 BM203D  | <i>H2A histone</i> gene                    | noncoding (intron) | NA           | A/T    | A               | <b>1</b>     | *   | 1.000          | 0               | 0                                               | 0.000 | AY267757.1         | Zbawicka et al. 2012 |
| 23 BM204A  | <i>p53</i>                                 | coding             | synon        | C/T    | T               | <b>0.333</b> |     | 0.169          | 0.023           | 7                                               | 0.080 | DQ865151           | Zbawicka et al. 2012 |
| 24 BM21B   | qm-like protein                            | coding             | nonsyn       | C/G    | C               | 0.726        |     | 0.491          | -0.071          | 13                                              | 0.104 | KJ871047           | Zbawicka et al. 2014 |
| 25 BM21C   | qm-like protein                            | coding             | synon        | A/C/T  | A               | 0.652        |     | 0.137          | -0.092          | 8                                               | NA    | KJ871047           | Zbawicka et al. 2014 |
| 26 BM26B   | UnKnown13                                  | NA                 | NA           | A/T    | A               | 0.794        |     | 0.126          | -0.102          | 4                                               | 0.015 | KJ871050           | Zbawicka et al. 2014 |
| 27 BM2G    | UnKnown05                                  | coding             | synon        | G/T    | G               | 0.944        |     | 0.095          | -0.042          | 1                                               | 0.003 | KJ871032           | Zbawicka et al. 2014 |
| 28 BM30A   | Ribosomal protein I17                      | coding             | synon        | A/G    | A               | 0.856        |     | 0.086          | -0.150          | 1                                               | 0.008 | KJ871052           | Zbawicka et al. 2014 |
| 29 BM30C   | Ribosomal protein I17                      | coding             | synon        | A/T    | T               | 0.51         |     | 0.052          | 0.087           | 1                                               | 0.025 | KJ871052           | Zbawicka et al. 2014 |
| 30 BM32A   | ubiquinol-cytochrome c reductase subunit 6 | coding             | synon        | A/G    | G               | <b>0.098</b> | *   | 0.496          | <b>0.086</b>    | 19                                              | 0.362 | KT713371           | Wenne et al. 2016    |
| 31 BM33B   | Cytochrome c oxidase subunit IV            | coding             | synon        | A/T    | A               | 0.398        |     | 0.051          | -0.130          | 3                                               | 0.027 | KJ871054           | Zbawicka et al. 2014 |
| 32 BM35C   | Ribosomal protein L7                       | coding             | synon        | A/T    | A               | <b>0.37</b>  | *   | 0.488          | 0.049           | 19                                              | 0.223 | KJ871055           | Wenne et al. 2016    |
| 33 BM36F   | ribosomal protein S3a                      | coding             | synon        | A/C    | A               | 0.777        |     | 0.129          | 0.081           | 6                                               | 0.016 | KT713373           | Wenne et al. 2016    |
| 34 BM38B   | ribosomal protein S8e                      | coding             | synon        | A/G    | G               | <b>0.255</b> | *   | 0.381          | 0.010           | 19                                              | 0.180 | KT713368           | Wenne et al. 2016    |
| 35 BM44B   | ubiquitin/ribosomal protein S27a           | coding             | synon        | A/G    | G               | 0.526        |     | 0.053          | <b>0.492</b>    | 1                                               | 0.024 | KJ871057           | Zbawicka et al. 2014 |
| 36 BM50B   | CoA-binding protein                        | coding             | synon        | A/G    | G               | 0.056        |     | 0.007          | -0.060          | 1                                               | 0.004 | KJ871059           | Zbawicka et al. 2014 |
| 37 BM54A   | ETC_C1_NDUFA4                              | coding             | synon        | A/G    | A               | <b>1</b>     | *   | 1.000          | 0               | 0                                               | 0.000 | KJ871060           | Zbawicka et al. 2014 |
| 38 BM57A   | NADH-ubiquinone oxidoreductase             | coding             | nonsyn       | C/T    | C               | 0.523        |     | 0.341          | <b>0.130</b>    | 11                                              | 0.120 | KT713374           | Wenne et al. 2016    |
| 39 BM57D   | NADH-ubiquinone oxidoreductase             | coding             | synon        | A/C    | C               | 0.445        |     | 0.152          | 0.000           | 4                                               | 0.072 | KT713374           | Wenne et al. 2016    |
| 40 BM5B    | Ribosomal protein S6e                      | coding             | synon        | A/G    | A               | 0.069        |     | 0.027          | -0.083          | 3                                               | 0.014 | KJ871035           | Wenne et al. 2016    |
| 41 BM5D    | Ribosomal protein S6e                      | coding             | synon        | C/T    | C               | <b>0.263</b> |     | 0.141          | -0.067          | 8                                               | 0.071 | KJ871035           | Zbawicka et al. 2014 |
| 42 BM61A   | Ribosomal_L1                               | coding             | synon        | C/T    | T               | <b>0.316</b> | *   | 0.502          | <b>0.270</b>    | 18                                              | 0.247 | KT713375           | Wenne et al. 2016    |
| 43 BM62A   | Ribosomal L13e                             | coding             | synon        | A/G    | G               | 0.664        |     | 0.152          | 0.168           | 6                                               | 0.028 | KJ871064           | Zbawicka et al. 2014 |
| 44 BM64A   | Ribosomal protein L35                      | coding             | synon        | C/T    | C               | <b>1</b>     | *   | 1.000          | 0               | 0                                               | 0.000 | KJ871065           | Zbawicka et al. 2014 |
| 45 BM67C   | Ribosomal protein S6e                      | coding             | synon        | A/T    | T               | <b>0.292</b> | *   | 0.477          | <b>0.118</b>    | 18                                              | 0.273 | KJ871066           | Wenne et al. 2016    |
| 46 BM6C    | EFG_N                                      | coding             | synon        | C/T    | C               | 0.626        |     | 0.512          | 0.059           | 13                                              | 0.133 | KJ871036           | Zbawicka et al. 2014 |
| 47 BM78B   | UnKnown12                                  | coding             | synon        | A/G    | G               | 0.592        |     | 0.380          | 0.057           | 15                                              | 0.104 | KJ871069           | Zbawicka et al. 2014 |
| 48 BM8E    | Ribosomal protein L3                       | coding             | synon        | A/G    | G               | <b>0.966</b> |     | 0.103          | -0.001          | 2                                               | 0.002 | KJ871038           | Zbawicka et al. 2014 |
| 49 BM92B   | UnKnown06                                  | coding             | synon        | A/T    | A               | <b>1</b>     | *   | 1.000          | 0               | 0                                               | 0.000 | KJ871074           | Zbawicka et al. 2014 |
| 50 BM9B    | Ribosomal protein S2                       | coding             | synon        | A/G    | G               | <b>0.143</b> | *   | 0.496          | <b>0.099</b>    | 19                                              | 0.352 | KJ871039           | Zbawicka et al. 2014 |
| 51 BM9C    | Ribosomal protein S2                       | coding             | synon        | A/C/T  | A               | <b>0.212</b> | *   | 0.544          | 0.059           | 19                                              | NA    | KJ871039           | Zbawicka et al. 2014 |

Values with P < 0.05 are marked in bold; \*, values with P < 0.05 after Benjamini–Yekutieli correction;  $F_{IS}$ , inbreeding coefficient;  $H_o$ , observed heterozygosity; NA, not applicable
