# Supplementary material for: Single nucleotide polymorphisms in native South American Atlantic coast populations of smooth shelled mussels: hybridization with invasive European Mytilus galloprovincialis
Source: Springer Nature journal article supplement (doi:10.1186/s12711-018-0376-z), 2018-02-22

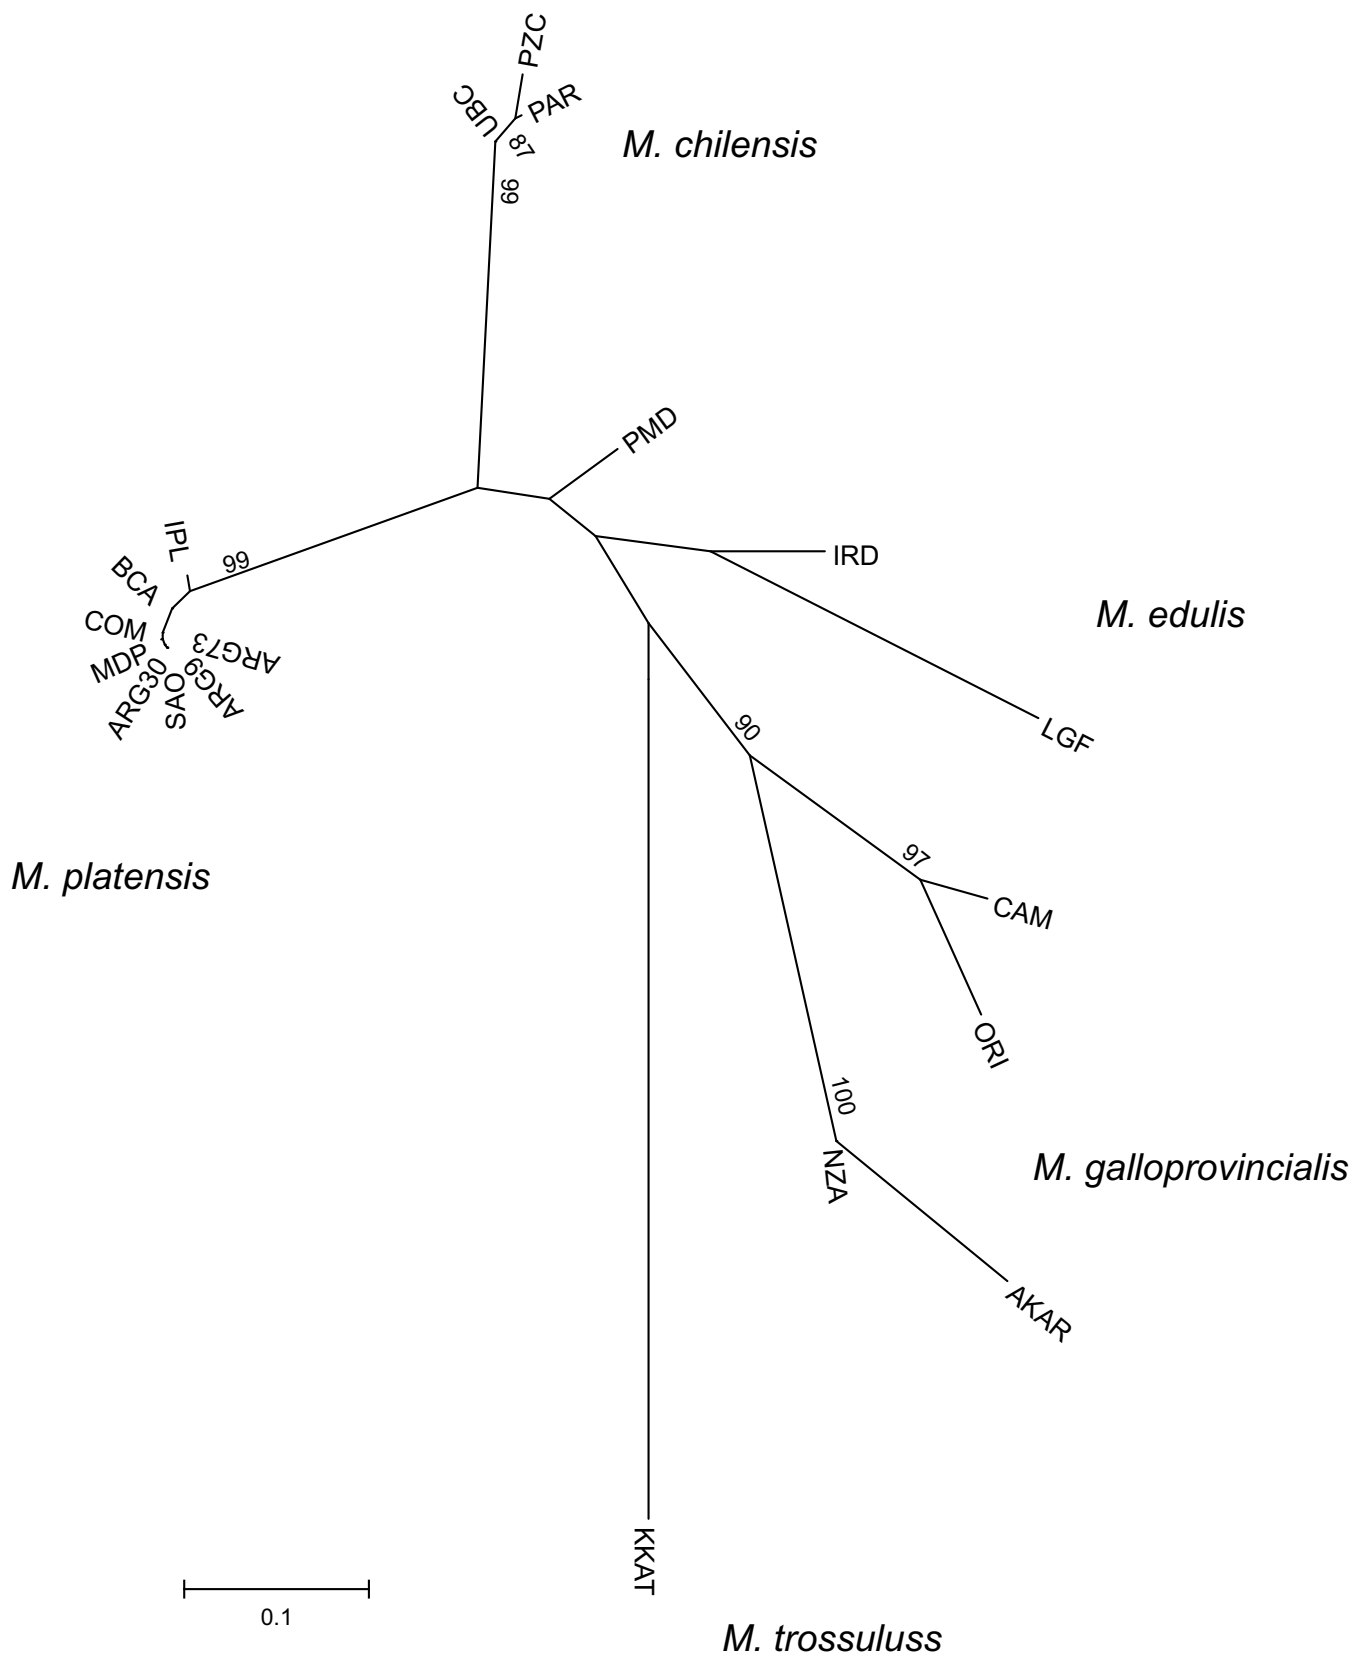

Supplement: MOESM3 [file 12711_2018_376_MOESM3_ESM.pdf]
