# Supplementary material for: Single nucleotide polymorphisms in native South American Atlantic coast populations of smooth shelled mussels: hybridization with invasive European Mytilus galloprovincialis
Source: Springer Nature journal article supplement (doi:10.1186/s12711-018-0376-z), 2018-02-22
Supplement: MOESM4 [file 12711_2018_376_MOESM4_ESM.pdf]

Table S3.  $F_{ST}$  distance matrix for 51 SNP.

| name  | ARG30        | ARG73        | ARG9         | IPL          | PMD          | SAO          | BCA          | COM          | MDP          | UBC          | PZC          | PAR          | IRD          | LGF          | CAM          | ORI          | NZA          | AKAR         |
|-------|--------------|--------------|--------------|--------------|--------------|--------------|--------------|--------------|--------------|--------------|--------------|--------------|--------------|--------------|--------------|--------------|--------------|--------------|
| ARG73 | -0.005       |              |              |              |              |              |              |              |              |              |              |              |              |              |              |              |              |              |
| ARG9  | -0.007       | -0.007       |              |              |              |              |              |              |              |              |              |              |              |              |              |              |              |              |
| IPL   | <b>0.043</b> | <b>0.051</b> | <b>0.049</b> |              |              |              |              |              |              |              |              |              |              |              |              |              |              |              |
| PMD   | <b>0.290</b> | <b>0.299</b> | <b>0.307</b> | <b>0.228</b> |              |              |              |              |              |              |              |              |              |              |              |              |              |              |
| SAO   | -0.004       | -0.009       | -0.011       | <b>0.036</b> | <b>0.273</b> |              |              |              |              |              |              |              |              |              |              |              |              |              |
| BCA   | 0.013        | 0.025        | 0.016        | 0.010        | <b>0.260</b> | 0.024        |              |              |              |              |              |              |              |              |              |              |              |              |
| COM   | -0.001       | 0.007        | 0.009        | <b>0.042</b> | <b>0.271</b> | 0.006        | 0.009        |              |              |              |              |              |              |              |              |              |              |              |
| MDP   | 0.005        | 0.006        | 0.003        | <b>0.039</b> | <b>0.290</b> | 0.006        | 0.012        | 0.005        |              |              |              |              |              |              |              |              |              |              |
| UBC   | <b>0.349</b> | <b>0.372</b> | <b>0.361</b> | <b>0.357</b> | <b>0.285</b> | <b>0.351</b> | <b>0.365</b> | <b>0.350</b> | <b>0.364</b> |              |              |              |              |              |              |              |              |              |
| PZC   | <b>0.439</b> | <b>0.456</b> | <b>0.450</b> | <b>0.435</b> | <b>0.297</b> | <b>0.441</b> | <b>0.443</b> | <b>0.436</b> | <b>0.445</b> | <b>0.041</b> |              |              |              |              |              |              |              |              |
| PAR   | <b>0.401</b> | <b>0.422</b> | <b>0.415</b> | <b>0.403</b> | <b>0.290</b> | <b>0.405</b> | <b>0.413</b> | <b>0.401</b> | <b>0.410</b> | 0.007        | <b>0.028</b> |              |              |              |              |              |              |              |
| IRD   | <b>0.356</b> | <b>0.365</b> | <b>0.363</b> | <b>0.347</b> | <b>0.279</b> | <b>0.365</b> | <b>0.319</b> | <b>0.334</b> | <b>0.362</b> | <b>0.459</b> | <b>0.494</b> | <b>0.475</b> |              |              |              |              |              |              |
| LGF   | <b>0.555</b> | <b>0.561</b> | <b>0.566</b> | <b>0.523</b> | <b>0.319</b> | <b>0.557</b> | <b>0.521</b> | <b>0.531</b> | <b>0.546</b> | <b>0.549</b> | <b>0.552</b> | <b>0.543</b> | <b>0.261</b> |              |              |              |              |              |
| CAM   | <b>0.606</b> | <b>0.611</b> | <b>0.616</b> | <b>0.570</b> | <b>0.208</b> | <b>0.597</b> | <b>0.583</b> | <b>0.591</b> | <b>0.603</b> | <b>0.544</b> | <b>0.515</b> | <b>0.526</b> | <b>0.419</b> | <b>0.368</b> |              |              |              |              |
| ORI   | <b>0.650</b> | <b>0.659</b> | <b>0.661</b> | <b>0.611</b> | <b>0.217</b> | <b>0.644</b> | <b>0.626</b> | <b>0.633</b> | <b>0.646</b> | <b>0.565</b> | <b>0.534</b> | <b>0.553</b> | <b>0.533</b> | <b>0.490</b> | <b>0.118</b> |              |              |              |
| NZA   | <b>0.661</b> | <b>0.676</b> | <b>0.671</b> | <b>0.610</b> | <b>0.307</b> | <b>0.667</b> | <b>0.625</b> | <b>0.643</b> | <b>0.644</b> | <b>0.544</b> | <b>0.505</b> | <b>0.519</b> | <b>0.554</b> | <b>0.522</b> | <b>0.348</b> | <b>0.338</b> |              |              |
| AKAR  | <b>0.769</b> | <b>0.784</b> | <b>0.778</b> | <b>0.729</b> | <b>0.475</b> | <b>0.796</b> | <b>0.730</b> | <b>0.746</b> | <b>0.743</b> | <b>0.674</b> | <b>0.636</b> | <b>0.649</b> | <b>0.677</b> | <b>0.661</b> | <b>0.538</b> | <b>0.550</b> | <b>0.113</b> |              |
| KKAT  | <b>0.797</b> | <b>0.803</b> | <b>0.801</b> | <b>0.784</b> | <b>0.705</b> | <b>0.795</b> | <b>0.784</b> | <b>0.790</b> | <b>0.793</b> | <b>0.776</b> | <b>0.769</b> | <b>0.777</b> | <b>0.755</b> | <b>0.776</b> | <b>0.765</b> | <b>0.778</b> | <b>0.796</b> | <b>0.847</b> |

Values with  $P < 0.05$  after Benjamini–Yekutieli (FDR-BY) correction is marked in bold. See Table 1 for site name definition.
