# Supplementary material for: Single nucleotide polymorphisms in native South American Atlantic coast populations of smooth shelled mussels: hybridization with invasive European Mytilus galloprovincialis
Source: Springer Nature journal article supplement (doi:10.1186/s12711-018-0376-z), 2018-02-22
Supplement: MOESM5 [file 12711_2018_376_MOESM5_ESM.pdf]

Table S4. Result of population assignment algorithms STRUCTURE and GeneClass for 19 populations of mussels.

| Name  | STRUCTURE (K=5) |             |             |             |           | GeneClass Assigned to species |                     |                  |                             |                     | GeneClass Assigned of individuals to origin region |            |               |     |             |             |            |           |           |      |           |
|-------|-----------------|-------------|-------------|-------------|-----------|-------------------------------|---------------------|------------------|-----------------------------|---------------------|----------------------------------------------------|------------|---------------|-----|-------------|-------------|------------|-----------|-----------|------|-----------|
|       | Clusters        |             |             |             |           |                               |                     |                  |                             |                     |                                                    |            |               |     |             |             |            |           |           |      |           |
|       | 1               | 2           | 3           | 4           | 5         | <i>M. platensis</i>           | <i>M. chilensis</i> | <i>M. edulis</i> | <i>M. galloprovincialis</i> | <i>M. trossulus</i> | ARG30, ARG73, ARG9,<br>IPL, SAO, BCA, COM, MDP     | PMD        | UBC, PZC, PAR | IRD | LGF         | CAM         | ORI        | NZA       | AKAR      | KKAT |           |
| ARG30 | 30 (100%)       |             |             |             |           | 30 (100%)                     |                     |                  |                             |                     | 30 (100%)                                          |            |               |     |             |             |            |           |           |      |           |
| ARG73 | 29 (96.67%)     | 1 (3.33%)   |             |             |           | 29 (96.67%)                   | 1 (3.33%)           |                  |                             |                     | 29 (96.67%)                                        |            | 1 (3.33%)     |     |             |             |            |           |           |      |           |
| ARG9  | 30 (100%)       |             |             |             |           | 30 (100%)                     |                     |                  |                             |                     | 30 (100%)                                          |            |               |     |             |             |            |           |           |      |           |
| IPL   | 29 (100%)       |             |             |             |           | 29 (100%)                     |                     |                  |                             |                     | 29 (100%)                                          |            |               |     |             |             |            |           |           |      |           |
| PMD   | 8 (29.63%)      | 1 (3.7%)    | 1 (3.7%)    | 17 (62.96%) |           | 10 (37.04%)                   | 1 (3.7%)            | 4 (14.81%)       | 12 (44.44%)                 |                     | 2 (7.4%)                                           | 24 (88.9%) |               |     |             | 1 (3.7%)    |            |           |           |      |           |
| SAO   | 19 (100%)       |             |             |             |           | 19 (100%)                     |                     |                  |                             |                     | 19 (100%)                                          |            |               |     |             |             |            |           |           |      |           |
| BCA   | 34 (100%)       |             |             |             |           | 34 (100%)                     |                     |                  |                             |                     | 34 (100%)                                          |            |               |     |             |             |            |           |           |      |           |
| COM   | 35 (100%)       |             |             |             |           | 35 (100%)                     |                     |                  |                             |                     | 35 (100%)                                          |            |               |     |             |             |            |           |           |      |           |
| MDP   | 36 (100%)       |             |             |             |           | 36 (100%)                     |                     |                  |                             |                     | 36 (100%)                                          |            |               |     |             |             |            |           |           |      |           |
| UBC   | 1 (3.45%)       | 28 (96.55%) |             |             |           | 1 (3.45%)                     | 28 (96.55%)         |                  |                             |                     | 1 (3.45%)                                          |            | 28 (96.55%)   |     |             |             |            |           |           |      |           |
| PZC   |                 | 30 (100%)   |             |             |           |                               | 30 (100%)           |                  |                             |                     |                                                    |            | 30 (100%)     |     |             |             |            |           |           |      |           |
| PAR   |                 | 33 (100%)   |             |             |           |                               | 33 (100%)           |                  |                             |                     |                                                    |            | 33 (100%)     |     |             |             |            |           |           |      |           |
| IRD   | 1 (3.33%)       |             | 29 (96.67%) |             |           | 1 (3.33%)                     |                     | 29 (96.67%)      |                             |                     | 1 (3.33%)                                          |            | 29 (96.67%)   |     |             |             |            |           |           |      |           |
| LGF   |                 |             | 27 (100%)   |             |           |                               |                     | 27 (100%)        |                             |                     |                                                    |            | 27 (100%)     |     |             |             |            |           |           |      |           |
| CAM   |                 |             |             | 29 (100%)   |           |                               |                     |                  | 29 (100%)                   |                     |                                                    |            |               |     | 26 (89.65%) | 3 (10.35%)  |            |           |           |      |           |
| ORI   |                 |             |             | 29 (100%)   |           |                               |                     |                  | 29 (100%)                   |                     |                                                    |            |               |     | 1 (3.45%)   | 28 (96.55%) |            |           |           |      |           |
| NZA   |                 |             |             | 27 (100%)   |           |                               |                     |                  | 27 (100%)                   |                     |                                                    |            |               |     |             |             | 24 (88.9%) | 3 (11.1%) |           |      |           |
| AKAR  |                 |             |             | 30 (100%)   |           |                               |                     |                  | 30 (100%)                   |                     |                                                    |            |               |     |             |             |            |           | 30 (100%) |      |           |
| KKAT  |                 |             |             |             | 28 (100%) |                               |                     |                  |                             | 28 (100%)           |                                                    |            |               |     |             |             |            |           |           |      | 28 (100%) |

GeneClass

Assigned PMD individuals to study populations after removal PMD sample from baseline populations

| IPL      | ARG30    | PZC      | IRD       | LGF      | CAM      | ORI |
|----------|----------|----------|-----------|----------|----------|-----|
| 9(33.33) | 1 (3.7%) | 1 (3.7%) | 4(14.81%) | 5(18.52) | 7(25.93) |     |
