# Supplementary material for: Single nucleotide polymorphisms in native South American Atlantic coast populations of smooth shelled mussels: hybridization with invasive European Mytilus galloprovincialis
Source: Springer Nature journal article supplement (doi:10.1186/s12711-018-0376-z), 2018-02-22
Supplement: MOESM6 [file 12711_2018_376_MOESM6_ESM.pdf]

Table S5. FST distance matrix for 51 SNP.

|       | ARG9   | SAO   | UBC   | PAR   | PZC   | LGF   | IRD   | CAM   | ORI   | NZA   | AKAR  | KKAT  |
|-------|--------|-------|-------|-------|-------|-------|-------|-------|-------|-------|-------|-------|
| ARG30 | -0.005 | 0.001 | 0.359 | 0.398 | 0.443 | 0.531 | 0.395 | 0.601 | 0.639 | 0.66  | 0.764 | 0.781 |
| ARG9  |        | -0.01 | 0.387 | 0.428 | 0.468 | 0.547 | 0.409 | 0.62  | 0.657 | 0.682 | 0.785 | 0.79  |
| SAO   |        |       | 0.393 | 0.433 | 0.477 | 0.552 | 0.423 | 0.624 | 0.662 | 0.69  | 0.796 | 0.795 |
| UBC   |        |       |       | 0.003 | 0.032 | 0.557 | 0.49  | 0.543 | 0.568 | 0.567 | 0.689 | 0.768 |
| PAR   |        |       |       |       | 0.028 | 0.559 | 0.508 | 0.533 | 0.56  | 0.559 | 0.685 | 0.768 |
| PZC   |        |       |       |       |       | 0.571 | 0.523 | 0.525 | 0.549 | 0.548 | 0.67  | 0.765 |
| LGF   |        |       |       |       |       |       | 0.25  | 0.411 | 0.526 | 0.57  | 0.685 | 0.77  |
| IRD   |        |       |       |       |       |       |       | 0.442 | 0.552 | 0.593 | 0.703 | 0.754 |
| CAM   |        |       |       |       |       |       |       |       | 0.097 | 0.343 | 0.52  | 0.755 |
| ORI   |        |       |       |       |       |       |       |       |       | 0.353 | 0.539 | 0.766 |
| NZA   |        |       |       |       |       |       |       |       |       |       | 0.103 | 0.791 |
| AKAR  |        |       |       |       |       |       |       |       |       |       |       | 0.84  |

Values with  $P < 0.05$  after Benjamini–Yekutieli (FDR-BY) correction is marked in bold. See Table 1 for site name definition.
