# Supplementary material for: Single nucleotide polymorphisms in native South American Atlantic coast populations of smooth shelled mussels: hybridization with invasive European Mytilus galloprovincialis
Source: Genet Sel Evol. 2018 Feb 22;50:5. doi: 10.1186/s12711-018-0376-z (PMC5824471; doi:10.1186/s12711-018-0376-z)
Supplement: Supplementary file 2 — Additional file 2: Table S2. Allele frequencies of 51 SNPs for 19 Mytilus spp. sample. Description: The data show frequencies of all alleles at the studied SNP loci in all samples. [file 12711_2018_376_MOESM2_ESM.pdf]

TableS2. Allele frequencies of 51 SNP loci for 19 *Mytilus* spp. populations

| Allele |   | ARG30 | ARG73  | ARG9   | IPL    | PMD    | SAO    | BCA    | COM    | MDP    | UBC    | PZC    | PAR    | IRD    | LGF    | CAM    | ORI    | NZA    | AKAR   | KKAT   |
|--------|---|-------|--------|--------|--------|--------|--------|--------|--------|--------|--------|--------|--------|--------|--------|--------|--------|--------|--------|--------|
| BM101A | 1 | A     | 0      | 0      | 0      | 0.0714 | 0.5385 | 0      | 0.0147 | 0      | 0.0139 | 0.2414 | 0.4667 | 0.2879 | 0      | 0.0417 | 1      | 1      | 1      | 0      |
| BM101A | 2 | T     | 1      | 1      | 1      | 0.9286 | 0.4615 | 1      | 0.9853 | 1      | 0.9861 | 0.7586 | 0.5333 | 0.7121 | 1      | 0.9583 | 0      | 0      | 0      | 0      |
| BM102A | 1 | C     | 0      | 0.1167 | 0.0862 | 0.1207 | 0.0345 | 0.0769 | 0.0526 | 0.0735 | 0.1    | 0.0139 | 0.2414 | 0.3833 | 0.1818 | 0.4667 | 0.3125 | 0.3393 | 0.12   | 0      |
| BM102A | 2 | T     | 0.8833 | 0.9138 | 0.8793 | 0.9655 | 0.9231 | 0.9474 | 0.9265 | 0.9    | 0.9861 | 0.7586 | 0.6167 | 0.8182 | 0.5333 | 0.6875 | 0.6607 | 0.88   | 1      | 1      |
| BM103B | 1 | A     | 1      | 1      | 1      | 1      | 1      | 1      | 1      | 1      | 1      | 1      | 1      | 1      | 1      | 1      | 1      | 1      | 1      | 0.2593 |
| BM103B | 2 | G     | 0      | 0      | 0      | 0      | 0      | 0      | 0      | 0      | 0      | 0      | 0      | 0      | 0      | 0      | 0      | 0      | 0      | 0.7407 |
| BM105A | 1 | A     | 1      | 1      | 1      | 1      | 0.7407 | 1      | 1      | 1      | 0.9861 | 1      | 1      | 1      | 1      | 0.9815 | 0.431  | 0.5714 | 0.8704 | 1      |
| BM105A | 2 | G     | 0      | 0      | 0      | 0      | 0.2593 | 0      | 0      | 0      | 0.0139 | 0      | 0      | 0      | 0      | 0.0185 | 0.569  | 0.4286 | 0.1296 | 0      |
| BM106B | 1 | A     | 0      | 0      | 0.0333 | 0.0333 | 0      | 0.3333 | 0      | 0.1176 | 0.1143 | 0      | 0      | 0      | 1      | 1      | 1      | 0.8571 | 0.2692 | 0      |
| BM106B | 2 | G     | 1      | 0.9667 | 0.9667 | 1      | 0.6667 | 1      | 0.8824 | 0.8857 | 1      | 1      | 1      | 1      | 0      | 0      | 0      | 0.1429 | 0.7308 | 1      |
| BM108  | 1 | A     | 1      | 1      | 1      | 1      | 1      | 1      | 1      | 1      | 1      | 1      | 1      | 1      | 1      | 1      | 1      | 1      | 1      | 0.1923 |
| BM108  | 2 | C     | 0      | 0      | 0      | 0      | 0      | 0      | 0      | 0      | 0      | 0      | 0      | 0      | 0      | 0      | 0      | 0      | 0      | 0.8077 |
| BM113A | 1 | A     | 1      | 1      | 1      | 1      | 1      | 1      | 1      | 1      | 1      | 1      | 1      | 1      | 1      | 1      | 1      | 1      | 1      | 0      |
| BM113A | 2 | T     | 0      | 0      | 0      | 0      | 0      | 0      | 0      | 0      | 0      | 0      | 0      | 0      | 0      | 0      | 0      | 0      | 0      | 1      |
| BM118A | 1 | A     | 0      | 0      | 0      | 0      | 0.1042 | 0      | 0      | 0      | 0      | 0      | 0      | 0      | 0      | 0.0577 | 0.0926 | 0.2586 | 0      | 0.0357 |
| BM118A | 2 | G     | 1      | 1      | 1      | 1      | 0.8958 | 1      | 1      | 1      | 1      | 1      | 1      | 1      | 1      | 0.9423 | 0.9074 | 0.7414 | 1      | 0.9643 |
| BM11A  | 1 | A     | 1      | 1      | 1      | 1      | 1      | 1      | 1      | 1      | 1      | 1      | 1      | 1      | 0.9833 | 1      | 1      | 1      | 1      | 0      |
| BM11A  | 2 | G     | 0      | 0      | 0      | 0      | 0      | 0      | 0      | 0      | 0      | 0      | 0      | 0      | 0.0167 | 0      | 0      | 0      | 0      | 1      |
| BM12A  | 1 | C     | 0      | 0      | 0      | 0      | 0.3519 | 0      | 0      | 0.0147 | 0      | 0      | 0      | 0      | 0.8167 | 0.9815 | 0.9828 | 1      | 1      | 0.9833 |
| BM12A  | 2 | T     | 1      | 1      | 1      | 1      | 0.6481 | 1      | 1      | 0.9853 | 1      | 1      | 1      | 1      | 0.1833 | 0.0185 | 0.0172 | 0      | 0      | 0.875  |
| BM12C  | 1 | C     | 0.9483 | 1      | 0.9833 | 1      | 0.8654 | 1      | 0.9677 | 0.9839 | 0.9028 | 0.9655 | 1      | 0.9211 | 0.2143 | 0.0926 | 0.1897 | 0.7414 | 0.2963 | 0      |
| BM12C  | 2 | T     | 0.0517 | 0      | 0.0167 | 0      | 0.1346 | 0      | 0.0323 | 0.0161 | 0.0972 | 0.0345 | 0      | 0.0789 | 0.7857 | 0.9074 | 0.8103 | 0.2586 | 0.7037 | 1      |
| BM147A | 1 | C     | 0.9667 | 0.9833 | 0.9667 | 0.8621 | 0.9259 | 0.9474 | 0.8529 | 0.9    | 0.9306 | 0.6897 | 0.4667 | 0.4667 | 0.7273 | 1      | 0.9    | 0.931  | 0.7241 | 0.3148 |
| BM147A | 2 | T     | 0.0333 | 0.0167 | 0.0333 | 0.1379 | 0.0741 | 0.0526 | 0.1471 | 0.1    | 0.0924 | 0.3103 | 0.5333 | 0.2727 | 0      | 0.1    | 0.069  | 0.2759 | 0.6852 | 0.8    |
| BM151A | 1 | G     | 0.9483 | 0.931  | 0.9038 | 0.8966 | 0.9615 | 0.8611 | 0.9853 | 0.9857 | 0.9068 | 0      | 0      | 0      | 1      | 1      | 1      | 1      | 0      | 1      |
| BM151A | 2 | T     | 0.0517 | 0.069  | 0.0962 | 0.1034 | 0.0385 | 0.1389 | 0.0147 | 0.0143 | 0.0972 | 1      | 1      | 1      | 0      | 0      | 0      | 0      | 0      | 1      |
| BM16B  | 1 | A     | 0.9    | 0.8793 | 0.8667 | 0.8621 | 0.7037 | 0.8889 | 0.803  | 0.8143 | 0.8611 | 0.7759 | 0.7333 | 0.803  | 0.8333 | 0.75   | 0.7931 | 0.7931 | 0.9074 | 0.95   |
| BM16B  | 2 | G     | 0.1    | 0.1207 | 0.1333 | 0.1379 | 0.2963 | 0.1111 | 0.197  | 0.1857 | 0.1389 | 0.2241 | 0.2667 | 0.197  | 0.1667 | 0.25   | 0.2069 | 0.2069 | 0.0926 | 0.05   |
| BM17B  | 1 | A     | 1      | 1      | 1      | 0.931  | 0.48   | 1      | 0.9853 | 1      | 0.9861 | 0.7586 | 0.5333 | 0.697  | 0.8667 | 0.6852 | 0      | 0      | 0.0185 | 0.1    |
| BM17B  | 2 | G     | 0      | 0      | 0      | 0.069  | 0.52   | 0      | 0.0147 | 0      | 0.0139 | 0.2414 | 0.4667 | 0.303  | 0.1333 | 0.3148 | 1      | 1      | 0.9815 | 1      |
| BM201B | 1 | A     | 0      | 0      | 0      | 0      | 0      | 0      | 0      | 0      | 0      | 0      | 0      | 0      | 0      | 0      | 0      | 0      | 0      | 0.7115 |
| BM201B | 2 | C     | 1      | 1      | 1      | 1      | 1      | 1      | 1      | 1      | 1      | 1      | 1      | 1      | 1      | 1      | 1      | 1      | 1      | 0.2885 |
| BM201C | 1 | G     | 0      | 0      | 0      | 0      | 0.38   | 0      | 0      | 0      | 0      | 0      | 0.0167 | 0      | 0.0167 | 0.0577 | 0.5893 | 0.8571 | 0.4231 | 0.3276 |
| BM201C | 2 | T     | 1      | 1      | 1      | 1      | 0.62   | 1      | 1      | 1      | 1      | 1      | 1      | 1      | 0.9833 | 0.9423 | 0.4107 | 0.1429 | 0.5769 | 0.6724 |
| BM202A | 1 | A     | 1      | 1      | 1      | 1      | 1      | 1      | 1      | 1      | 1      | 1      | 1      | 1      | 1      | 1      | 1      | 1      | 1      | 1      |
| BM202A | 2 | C     | 0      | 0      | 0      | 0      | 0      | 0      | 0      | 0      | 0      | 0      | 0      | 0      | 0      | 0      | 0      | 0      | 0      | 1      |
| BM202B | 1 | A     | 0      | 0      | 0      | 0      | 0      | 0      | 0      | 0      | 0      | 0      | 0      | 0      | 0      | 0      | 0      | 0      | 0      | 1      |
| BM202B | 2 | T     | 1      | 1      | 1      | 1      | 1      | 1      | 1      | 1      | 1      | 1      | 1      | 1      | 1      | 1      | 1      | 1      | 1      | 0      |
| BM203B | 1 | C     | 1      | 1      | 1      | 1      | 0.62   | 1      | 1      | 1      | 1      | 1      | 1      | 1      | 0.9833 | 0.9259 | 0.4    | 0.1852 | 0.6087 | 0.6607 |
| BM203B | 2 | T     | 0      | 0      | 0      | 0      | 0.38   | 0      | 0      | 0      | 0      | 0      | 0      | 0.0167 | 0      | 0.0167 | 0.0471 | 0.6    | 0.8148 | 0.3913 |
| BM203C | 1 | A     | 0.85   | 0.9138 | 0.9828 | 0.875  | 0.3913 | 0.9722 | 0.9091 | 0.8235 | 0.9697 | 0.2222 | 0.0333 | 0.0806 | 0.6724 | 0.4286 | 0.1296 | 0.0172 | 0.1111 | 0.0517 |
| BM203C | 2 | G     | 0.15   | 0.0862 | 0.0172 | 0.125  | 0.6087 | 0.0278 | 0.0909 | 0.1765 | 0.0303 | 0.7778 | 0.9667 | 0.9194 | 0.3276 | 0.5714 | 0.8704 | 0.9828 | 0.8889 | 0.9483 |
| BM203D | 1 | A     | 1      | 1      | 1      | 1      | 1      | 1      | 1      | 1      | 1      | 1      | 1      | 1      | 1      | 1      | 1      | 1      | 1      | 0      |
| BM203D | 2 | T     | 0      | 0      | 0      | 0      | 0      | 0      | 0      | 0      | 0      | 0      | 0      | 0      | 0.0833 | 0.0556 | 0.3571 | 0.6429 | 0.2222 | 0.15   |
| BM204A | 1 | C     | 0      | 0      | 0      | 0      | 0.2963 | 0      | 0      | 0      | 0      | 0      | 0      | 0      | 0.0833 | 0.0556 | 0.3571 | 0.6429 | 0.2222 | 0.15   |
| BM204A | 2 | T     | 1      | 1      | 1      | 1      | 0.7037 | 1      | 1      | 1      | 1      | 1      | 1      | 1      | 0.9167 | 0.9444 | 0.6429 | 0.3571 | 0.7778 | 0.85   |
| BM204B | 1 | C     | 0.9833 | 0.9464 | 1      | 0.9464 | 0.5192 | 0.9737 | 1      | 0.9857 | 0.9583 | 0.6207 | 0.4167 | 0.4091 | 0.95   | 0      | 0      | 0.0185 | 0      | 0.9821 |
| BM204B | 2 | G     | 0.0167 | 0.0536 | 0      | 0.0536 | 0.4808 | 0.0263 | 0      | 0.0143 | 0.0417 | 0.3793 | 0.5833 | 0.5909 | 0.05   | 1      | 1      | 0.9815 | 1      | 0.0179 |
| BM21C  | 1 | A     | 1      | 1      | 1      | 1      | 0.8148 | 1      | 1      | 1      | 1      | 1      | 1      | 1      | 0.95   | 0.0192 | 0.931  | 0.8966 | 0.963  | 0.9833 |
| BM21C  | 2 | C     | 0      | 0      | 0      | 0      | 0.0185 | 0      | 0      | 0      | 0      | 0      | 0      | 0      | 0.05   | 0.9615 | 0.0172 | 0      | 0      | 0.0179 |
| BM21C  | 3 | T     | 0      | 0      | 0      | 0      | 0.1667 | 0      | 0      | 0      | 0      | 0      | 0      | 0      | 0      | 0.0192 | 0.0517 | 0.1034 | 0.037  | 0.0167 |
| BM26B  | 1 | A     | 1      | 1      | 1      | 1      | 0.963  | 1      | 1      | 1      | 1      | 1      | 1      | 1      | 1      | 1      | 0.9483 | 0.8448 | 0.963  | 1      |
| BM26B  | 2 | T     | 0      | 0      | 0      | 0      | 0.037  | 0      | 0      | 0      | 0      | 0      | 0      | 0      | 0      | 0.0517 | 0.1552 | 0.037  | 0      | 1      |
| BM2G   | 1 | G     | 1      | 1      | 1      | 1      | 1      | 1      | 1      | 1      | 1      | 1      | 1      | 1      | 1      | 1      | 1      | 1      | 1      | 0.0556 |
| BM2G   | 2 | T     | 0      | 0      | 0      | 0      | 0      | 0      | 0      | 0      | 0      | 0      | 0      | 0      | 0      | 0      | 0      | 0      | 0      | 0.9444 |
| BM30A  | 1 | A     | 1      | 1      | 1      | 1      | 1      | 1      | 1      | 1      | 1      | 1      | 1      | 1      | 1      | 1      | 1      | 1      | 1      | 0.1429 |
| BM30A  | 2 | G     | 0      | 0      | 0      | 0      | 0      | 0      | 0      | 0      | 0      | 0      | 0      | 0      | 0      | 0      | 0      | 0      | 0      | 0.8571 |
| BM30C  | 1 | A     | 0      | 0      | 0      | 0      | 0      | 0      | 0      | 0      | 0      | 0      | 0      | 0      | 0      | 0      | 0      | 0      | 0      | 0.5179 |
| BM30C  | 2 | T     | 1      | 1      | 1      | 1      | 1      | 1      | 1      | 1      | 1      | 1      | 1      | 1      | 1      | 1      | 1      | 1      | 1      | 0.4821 |
| BM32A  | 1 | A     | 0.4138 | 0.3621 | 0.431  | 0.4138 | 0.48   | 0.3947 | 0.4559 | 0.4853 | 0.6029 | 0.3393 | 0.3667 | 0.2759 | 0.3333 | 0.5556 | 0.375  | 0.5385 | 0.7778 | 0.9038 |
| BM32A  | 2 | G     | 0.5862 | 0.6379 | 0.569  | 0.5862 | 0.52   | 0.6053 | 0.5441 | 0.5147 | 0.3971 | 0.6607 | 0.6333 | 0.7241 | 0.6667 | 0.4444 | 0.625  | 0.4615 | 0.2222 | 0.0962 |
| BM33B  | 1 | A     | 1      | 1      | 1      | 1      | 1      | 1      | 1      | 1      | 1      | 1      | 1      | 1      | 1      | 1      | 1      | 1      | 1      | 0.5417 |
| BM33B  | 2 | T     | 0      | 0      | 0      | 0      | 0      | 0      | 0      | 0      | 0      | 0      | 0      | 0      | 0      | 0      | 0      | 0      | 0.037  | 0.0179 |
| BM35C  | 1 | A     | 0.8333 | 0.931  | 0.8667 | 0.9138 | 0.5556 | 0.9474 | 0.7941 | 0.8824 | 0.9143 | 0.4107 | 0.3    | 0.3594 | 0.4833 | 0.56   | 0.3889 | 0.2759 | 0.0769 | 0.9286 |
| BM35C  | 2 | T     | 0.1667 | 0.069  | 0.1333 | 0.0862 | 0.4444 | 0.0526 | 0.2059 | 0.1176 | 0.0857 | 0.5893 | 0.7    | 0.6406 | 0.5167 | 0.44   | 0.6111 | 0.7241 | 0.9231 | 0.9333 |
| BM36F  | 1 | A     | 1      | 1      | 1      | 1      | 1      | 1      | 1      | 1      | 1      | 1      | 1      | 1      | 0.9408 | 0.9167 | 0.9655 | 0.9107 | 0.9792 | 1      |
| BM36F  | 2 | C     | 0      | 0      | 0      | 0      | 0      | 0      | 0      | 0      | 0      | 0      | 0      | 0      | 0.0517 | 0.0833 | 0.0345 | 0.0893 | 0.0208 | 0.9821 |
| BM38B  | 1 | A     | 0.1833 | 0.2069 | 0.15   | 0.1724 | 0.2037 | 0.0789 | 0.2188 | 0.2424 | 0.2639 | 0.1034 | 0.1552 | 0.0909 | 0.0333 | 0.0741 | 0.1552 | 0.2759 | 0.463  | 0.9333 |
| BM38B  | 2 | G     | 0.8167 | 0.7931 | 0.85   | 0.8276 | 0.7963 | 0.9211 | 0.7812 | 0.7576 | 0.7361 | 0.8966 | 0.8448 | 0.9091 | 0.9667 | 0.9259 | 0.8448 | 0.7241 | 0.537  | 0.0667 |
| BM44B  | 1 | A     | 0      | 0      | 0      | 0      | 0      | 0      | 0      | 0      | 0      | 0      | 0      | 0      | 0      | 0      | 0      | 0      | 0      | 0.537  |
| BM44B  | 2 | G     | 1      | 1      | 1      | 1      | 1      | 1      | 1      | 1      | 1      | 1      | 1      | 1      | 1      | 1      | 1      | 1      | 1      | 0.463  |
| BM50B  | 1 | A     | 0      | 0      | 0      | 0      | 0      | 0      | 0      | 0      | 0      | 0      | 0      | 0      | 0      | 0      | 0      | 0      | 0      | 0.0714 |
| BM50B  | 2 | G     | 1      | 1      | 1      | 1      | 1      | 1      | 1      | 1      | 1      | 1      | 1      | 1      | 1      | 1      | 1      | 1      | 1      | 0.9286 |
| BM54A  | 1 | A     | 1      | 1      | 1      | 1      | 1      | 1      | 1      | 1      | 1      | 1      | 1      | 1      | 1      | 1      | 1      | 1      | 1      | 1      |
| BM54A  | 2 | G     | 0      | 0      |        |        |        |        |        |        |        |        |        |        |        |        |        |        |        |        |
